# Supplementary material
Source: PubMed Central journal article supplement (PMC4402797)
Supplement: ijcem0008-2190-f5.pdf [file ijcem0008-2190-f5.pdf]

## As<sub>2</sub>O<sub>3</sub> induces apoptosis of hepatocellular carcinoma

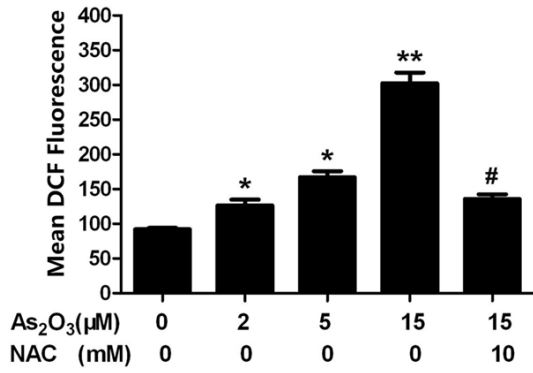

**Supplementary Figure 1.** Effect of As<sub>2</sub>O<sub>3</sub> on cellular ROS production. Cells were treated with indicated concentration of As<sub>2</sub>O<sub>3</sub> for 24 h in the presence or absence of 10 mM NAC pretreatment for 1 h, and then ROS level was determined. Results were expressed as mean DCF fluorescence. Data represent means ± SE of three independent experiments, \**P*<0.05 and \*\**P*<0.01 compared with control; #*P*<0.05 compared with 15 μM As<sub>2</sub>O<sub>3</sub> alone.

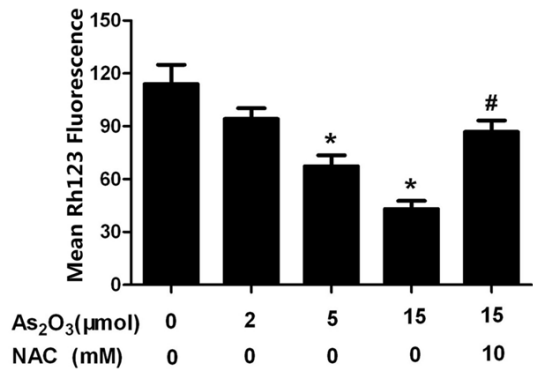

**Supplementary Figure 2.** Effect of As<sub>2</sub>O<sub>3</sub> on HepG2 mitochondrial. Rhodamine 123 staining followed by flow cytometry analysis was performed to determine mitochondrial membrane potential. Results were expressed as mean Rh123 fluorescence. Data represent means ± SE of three independent experiments \**P*<0.05 and \*\**P*<0.01 compared with control; #*P*<0.05 compared with 15 μM As<sub>2</sub>O<sub>3</sub> alone.

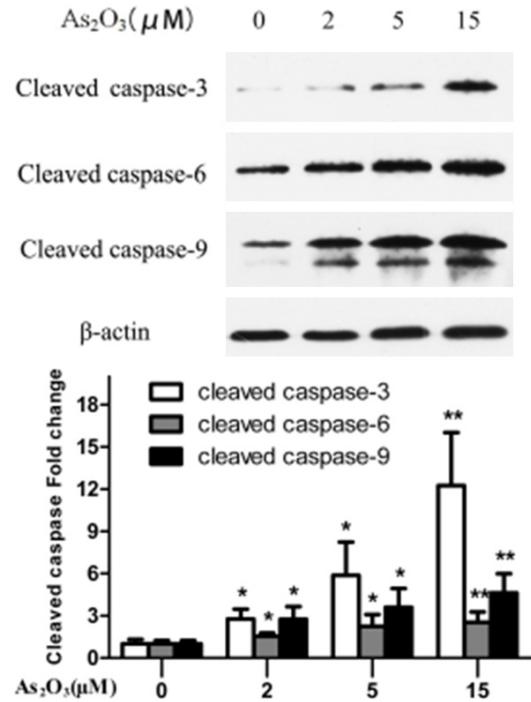

**Supplementary Figure 3.** Effect of As<sub>2</sub>O<sub>3</sub> on caspase in HepG2 cells. HepG2 cells were treated with 0-15 μM As<sub>2</sub>O<sub>3</sub> for 24 h. Expression of the cleaved caspase-3, caspase-6, and caspase-9 were detected by Western blotting analysis. The quantitative analysis of cleaved caspase-3, caspase-6, caspase-9, respectively. β-actin was used as internal control. Data represent as means ± SE of three independent experiments. \**P*<0.05 and \*\**P*<0.01 compared with control.
